# Supplementary material
Source: MDPI journal article supplement (https://www.mdpi.com/2073-4433/12/9/1127)
Supplement: s1 [file s1]

# Sources of PM<sub>2.5</sub>-Associated PAHs and n-Alkanes in Changzhou China

Ning Sun <sup>1</sup>, Xudong Li <sup>1</sup>, Ye Ji <sup>1</sup>, Hongying Huang <sup>1</sup>, Zhaolian Ye <sup>1,2,\*</sup> and Zhuizi Zhao <sup>1,\*</sup>

<sup>1</sup> College of Chemistry and Environmental Engineering, Jiangsu University of Technology, Changzhou 213001, China; sn850206399@163.com (N.S.); d17851080485@163.com (X.L.); jy1078523590@163.com (Y.J.); hhy@jsut.edu.cn (H.H.)

<sup>2</sup> Jiangsu Key Laboratory of Atmospheric Environment Monitoring and Pollution Control, Collaborative Innovation Center of Atmospheric Environment and Equipment Technology, School of Environmental Sciences and Engineering, Nanjing University of Information Science and Technology, Nanjing 210044, China

\* Correspondence: bess\_ye@jsut.edu.cn (Z.Y.); zhaozz@jsut.edu.cn (Z.Z.); Tel.: +86-519-86953064 (Z.Y. & Z.Z.)

**Table S1** The explanation of some abbreviations in this study.

| Abbreviation       | Explanation                                                                                       |
|--------------------|---------------------------------------------------------------------------------------------------|
| PM <sub>2.5</sub>  | Atmospheric particulate matter with aerodynamic diameters equal to or less than 2.5 $\mu\text{m}$ |
| OC                 | Organic carbon                                                                                    |
| EC                 | Elemental carbon                                                                                  |
| I/SVOCs            | Intermediate/semi volatile organic compounds                                                      |
| PAHs               | Polycyclic aromatic hydrocarbons                                                                  |
| $\Sigma$ PAHs      | Sum of individual polycyclic aromatic hydrocarbons                                                |
| $\Sigma$ n-alkanes | Sum of individual n-alkanes                                                                       |
| MDLs               | Method detection limits                                                                           |
| WSIIs              | Water-soluble ions                                                                                |
| SNA                | $\text{NO}_3^-$ , $\text{SO}_4^{2-}$ and $\text{NH}_4^+$                                          |
| OM                 | Organic matter                                                                                    |
| SS                 | Sea salt                                                                                          |
| CANPAHs            | Sum of the carcinogenic PAHs concentrations                                                       |
| COMPAHs            | Sum of the combustion-derived PAHs concentrations                                                 |
| $C_{\text{max}}$   | Carbon number with the maximum concentration                                                      |
| CPI                | Carbon preference index                                                                           |
| CPI1               | Carbon preference index of petrogenic n-alkanes                                                   |
| CPI2               | Carbon preference index of biogenic n-alkanes                                                     |
| PCA                | Principal component analysis                                                                      |

**Table S2** Abbreviations, molecular weight and method detection limits of individual n-alkanes and PAHs in this study.

| n-alkanes | Abbreviation    | MDLs<br>( $\text{ng}/\text{m}^3$ ) | PAHs         | Abbrevia<br>tion | MDLs<br>( $\text{ng}/\text{m}^3$ ) |
|-----------|-----------------|------------------------------------|--------------|------------------|------------------------------------|
| Nonane    | C <sub>9</sub>  | 0.057                              | Acenaphthene | Ace              | 0.0026                             |
| Decane    | C <sub>10</sub> | 0.053                              | Fluorene     | Flu              | 0.0053                             |

|                  |                 |       |                        |       |        |
|------------------|-----------------|-------|------------------------|-------|--------|
| Undecane         | C <sub>11</sub> | 0.044 | Phenanthrene           | Phe   | 0.0052 |
| Dodecane         | C <sub>12</sub> | 0.048 | Anthracene             | Ant   | 0.0077 |
| Tridecane        | C <sub>13</sub> | 0.045 | Fluoranthene           | Fla   | 0.0044 |
| Tetradecane      | C <sub>14</sub> | 0.051 | Pyrene                 | Pyr   | 0.0056 |
| Pentadecane      | C <sub>15</sub> | 0.046 | Benzo[a]anthracene     | BaA   | 0.0085 |
| Hexadecane       | C <sub>16</sub> | 0.061 | Chrysene               | Chry  | 0.0041 |
| Heptadecane      | C <sub>17</sub> | 0.043 | Benzo[b]fluoranthene   | BbF   | 0.0063 |
| Octadecane       | C <sub>18</sub> | 0.068 | Benzo[k]fluoranthene   | BkF   | 0.0055 |
| Nonadecane       | C <sub>19</sub> | 0.075 | Benzo[a]fluoranthene   | BaF   | 0.0053 |
| Eicosane         | C <sub>20</sub> | 0.074 | Benzo[e]pyrene         | BeP   | 0.0046 |
| Heneicosane      | C <sub>21</sub> | 0.073 | Benzo[a]pyrene         | BaP   | 0.0076 |
| Docosane         | C <sub>22</sub> | 0.081 | Perylene               | Per   | 0.0036 |
| Tricosane        | C <sub>23</sub> | 0.052 | Dibenzo[a,h]anthracene | DahA  | 0.0067 |
| Tetracosane      | C <sub>24</sub> | 0.058 | Indeno[1,2,3-cd]pyrene | InP   | 0.0072 |
| Pentacosane      | C <sub>25</sub> | 0.040 | Benzo[ghi]perylene     | BghiP | 0.0066 |
| Hexacosane       | C <sub>26</sub> | 0.057 |                        |       |        |
| Heptacosane      | C <sub>27</sub> | 0.052 |                        |       |        |
| Octacosane       | C <sub>28</sub> | 0.043 |                        |       |        |
| Nonacosane       | C <sub>29</sub> | 0.041 |                        |       |        |
| Tricontane       | C <sub>30</sub> | 0.048 |                        |       |        |
| Hentriacontane   | C <sub>31</sub> | 0.056 |                        |       |        |
| Dotriacontane    | C <sub>32</sub> | 0.043 |                        |       |        |
| Tritriacontane   | C <sub>33</sub> | 0.045 |                        |       |        |
| Tetratriacontane | C <sub>34</sub> | 0.054 |                        |       |        |
| Pentatriacontane | C <sub>35</sub> | 0.045 |                        |       |        |
| Hexatriacontane  | C <sub>36</sub> | 0.045 |                        |       |        |
| Heptatriacontane | C <sub>37</sub> | 0.047 |                        |       |        |
| Octatriacontane  | C <sub>38</sub> | 0.046 |                        |       |        |
| Nonatriacontane  | C <sub>39</sub> | 0.053 |                        |       |        |
| Tetracontane     | C <sub>40</sub> | 0.046 |                        |       |        |

**Table S3** Results of Mann-Witney statistics between samples in different polluted days.

|                                   | NO <sub>3</sub> <sup>-</sup> | nss-SO <sub>4</sub> <sup>2-</sup> | NH <sub>4</sub> <sup>+</sup> | SS    | OM    | EC    | dust  |
|-----------------------------------|------------------------------|-----------------------------------|------------------------------|-------|-------|-------|-------|
| Severely polluted VS polluted     | 0.468                        | 0.079                             | 0.182                        | 0.691 | 0.111 | 0.412 | 0.055 |
| Severely polluted VS non-polluted | 0.367                        | 0.000                             | 0.000                        | 0.008 | 0.184 | 0.339 | 0.007 |
| Polluted VS non-polluted          | 0.687                        | 0.000                             | 0.000                        | 0.022 | 0.781 | 0.495 | 0.351 |
